# Supplementary material for: Effects of Spray Application of Lactic Acid Solution and Aromatic Vinegar on the Microbial Loads of Wild Boar Carcasses Obtained under Optimal Harvest Conditions
Source: MDPI journal article supplement (doi:10.3390/app122010419), 2022-10-15
Supplement: s1 [file s1]

Archive with 1 entries (1 files):
- applsci-1938509-supplementary.pdf
