# Supplementary material for: Effects of Spray Application of Lactic Acid Solution and Aromatic Vinegar on the Microbial Loads of Wild Boar Carcasses Obtained under Optimal Harvest Conditions
Source: MDPI journal article supplement (doi:10.3390/app122010419), 2022-10-15
Supplement: s1 [file s1 › applsci-1938509-supplementary.pdf]

**Supplemental Materials**

**Table S1.** Preliminary evaluation of the Aerobic Colony Count (ACC) and Enterobacteriaceae Count (EC) in the three areas considered for sampling after skinning.

|     | Number of<br>samples | Site A      | Site B      | Site C      | P value |
|-----|----------------------|-------------|-------------|-------------|---------|
| ACC | 16                   | 1.94 ± 0.49 | 1.86± 0.55  | 1.89± 0.51  | n.s.    |
| EC  | 16                   | 1.63 ± 0.58 | 1.66 ± 0.61 | 1.59 ± 0.56 | n.s.    |

Mean values ± standard deviation. Results are expressed in log CFU/25 cm<sup>2</sup>. n.s.= not statistically significant
